# Supplementary material
Source: HighWire-hosted journal article supplement (https://bjgp.org/highwire/filestream/45165/field_highwire_adjunct_files/0/BJGP.2022.0025_suppl.pdf)
Supplement: BJGP.2022.0025_suppl.pdf [file BJGP.2022.0025_suppl.pdf]

1. (General practice or General practitioner\* or general practice physician\* or Primary care or primary health care or primary healthcare).ti,ab. or Primary health care/ or physicians, primary care/ or general practitioners/
2. cancer\*.ti,ab. or neoplasms/
3. diagnos\*.ti,ab. or diagnosis/
4. survivor\*.ti,ab. or survivor/
5. palliative care/
6. share\* care.mp.
7. prevent\*.mp.
8. Chemoprevention/
9. Diet/
10. alcohol.mp.
11. Smoking/pc or Smoking Cessation/ or Smoking/ or Smoke/
12. Exercise/ or Physical Activity/
13. Obesity/ep, mo, pc [Epidemiology, Mortality, Prevention & Control]
14. 1 and 2
15. 3 or 4 or 5 or 6 or 7 or 8 or 9 or 10 or 11 or 12 or 13
16. 14 and 15
17. limit 16 to English language

**For Embase search only:**

18. limit 17 to exclude medline journals

\* = Truncation (finding all terms that begin with the given string of text)  
 .ti.ab = searches for term in title & abstract  
 .mp = multiple field search (title, abstract, original title, name of substance word, subject heading word, keyword heading word, protocol supplementary concept word, rare disease supplementary concept word, unique identifier, synonyms)  
 exp = exploded thesaurus (picks up all articles that contain the term as a keyword)

Figure S1. Search strategy to identify cancer in primary care publications (Medline and Embase).

Table S1. Study designs used to classify included publications.

| Unfiltered evidence |                                   |                        | Filtered evidence  |
|---------------------|-----------------------------------|------------------------|--------------------|
| Observational       | Interventional                    | Other                  |                    |
| Cohort              | Feasibility                       | Qualitative            | Systematic reviews |
| Ecological          | Pilot                             | Evaluation             | Guidelines         |
| Cross-sectional     | Non-randomised trial              | Implementation studies |                    |
| Before and After    | Randomised controlled trial (RCT) | Mixed-methods studies  |                    |
| Case-control        |                                   | Audit                  |                    |
|                     |                                   | Other                  |                    |

Table S2. Tumour types investigated in included publications.

| <b>Rank</b> | <b>Tumour type</b>        | <b>N (%)</b> |
|-------------|---------------------------|--------------|
| 1           | All/Multiple types        | 880 (31.5)   |
| 2           | Colorectal                | 489 (17.5)   |
| 3           | Breast                    | 362 (12.9)   |
| 4           | Cervical                  | 227 (8.1)    |
| 5           | Prostate                  | 163 (5.8)    |
| 6           | Lung                      | 151 (5.4)    |
| 7           | Skin (excluding melanoma) | 106 (3.8)    |
| 8           | Paediatric/AYA            | 72 (2.6)     |
| 9           | Melanoma                  | 42 (1.5)     |
| 10          | Head & neck               | 31 (1.1)     |
| 11          | Oral                      | 30 (1.07)    |
| 12          | Haematological            | 29 (1.04)    |
| 13          | Anal                      | 25 (0.89)    |
| 14          | Ovarian                   | 22 (0.79)    |
| 15          | Liver                     | 21 (0.75)    |
| 16          | Bladder                   | 19 (0.68)    |
| 17          | Gynaecological            | 19 (0.68)    |
| 18          | Pancreatic                | 17 (0.61)    |
| 19          | Endometrial               | 15 (0.54)    |
| 20          | Oesophageal               | 14 (0.50)    |
| 21          | Thyroid                   | 9 (0.32)     |
| 22          | Gastric                   | 8 (0.29)     |
| 23          | Brain                     | 7 (0.25)     |
| 24          | Gastro-oesophageal        | 7 (0.25)     |
| 25          | Renal                     | 5 (0.18)     |
| 26          | Gastrointestinal          | 4 (0.14)     |
| 27          | Sarcoma                   | 4 (0.14)     |
| 28          | Metastatic                | 3 (0.11)     |
| 29          | Testicular                | 3 (0.11)     |
| 30          | Bile duct                 | 2 (0.07)     |
| 31          | Oropharyngeal             | 2 (0.07)     |
| 32          | Urologic                  | 2 (0.07)     |
| 33          | Other                     | 2 (0.07)     |
| 34          | Bone                      | 1 (0.04)     |
| 35          | Genitourinary             | 1 (0.04)     |
| 36          | Mesothelioma              | 1 (0.04)     |
| 37          | Nasopharyngeal            | 1 (0.04)     |
| 38          | Rare                      | 1 (0.04)     |
| 39          | Rectal                    | 1 (0.04)     |
|             | <b>Total</b>              | <b>2798</b>  |
